# Supplementary material
Source: Royal Society of Chemistry journal article supplement (doi:10.1039/d6ta01820c)
Supplement: d6ta01820c1.pdf [file d6ta01820c1.pdf]

## Electronic Supplementary Information (ESI)

### Orchestrated Spatial Confinement and Phase Engineering with SDS for Air-Stable and High-Rate Alluaudite Sodium-Ion Cathodes

*Ye Tao,<sup>a</sup> Fangzhou Zhao,<sup>a</sup> Yuqi Zhou,<sup>a</sup> Weijian Wang,<sup>a</sup> Wanglai Cen,<sup>a</sup> Jianyong Wang,<sup>b</sup>  
Xinglin Tang,<sup>c</sup> Ting Wang,<sup>c</sup> Xiaodong Hu,<sup>d</sup> and Yongzhi Zhang<sup>\*a</sup>*

<sup>a</sup>. Institute of New Energy and Low-Carbon Technology (INELT), Sichuan University, Chengdu 610065, China

<sup>b</sup>. State Key Laboratory of Advanced Chemical Power Sources, Guizhou Meiling Power Sources Co. Ltd., Zunyi 563003, China

<sup>c</sup>. School of Chemical Engineering, Sichuan University, Chengdu 610065, China.

<sup>d</sup>. College of New Energy and Materials, Leshan Vocational and Technical College, Leshan 614000, China

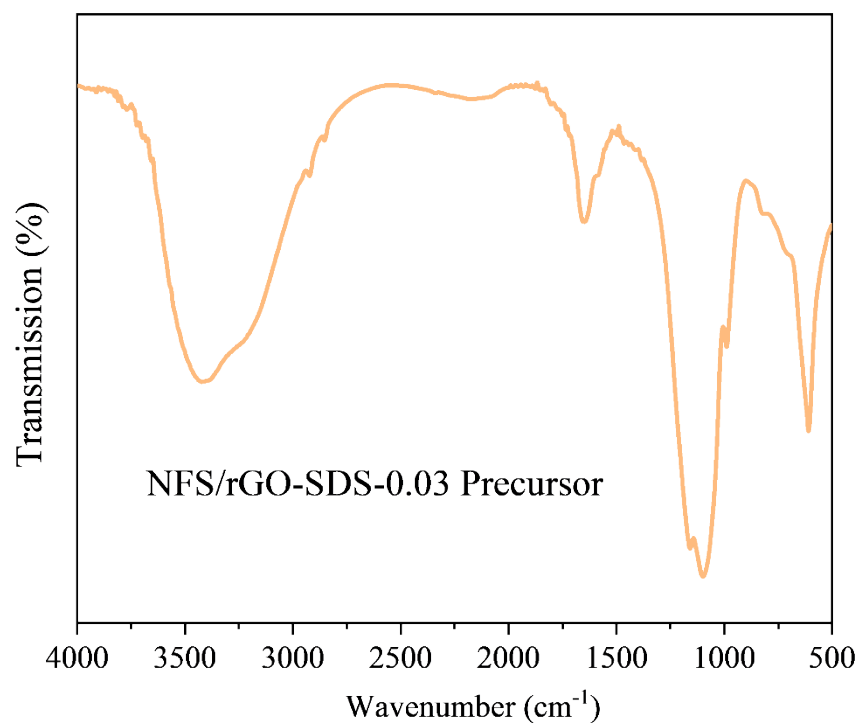

**Fig. S1.** FT-IR spectrum of the NFS/rGO-SDS-0.03 precursor.

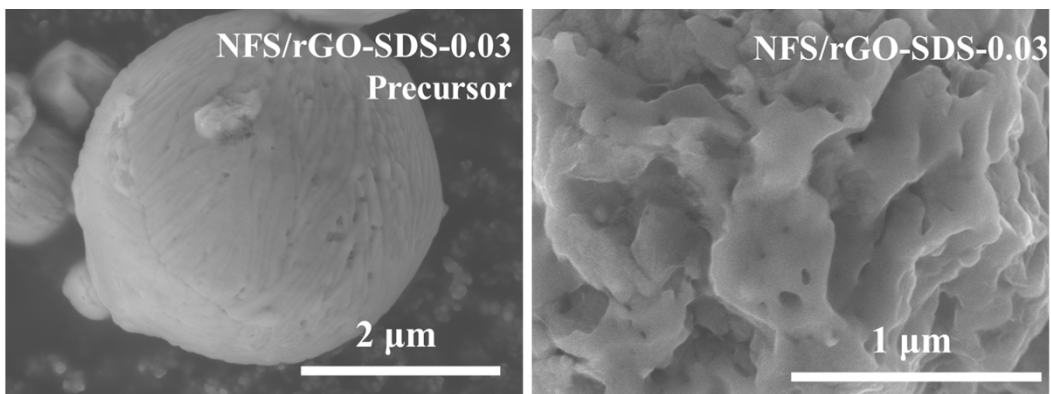

**Fig. S2.** SEM images of the NFS/rGO-SDS-0.03 precursor and sintered samples.

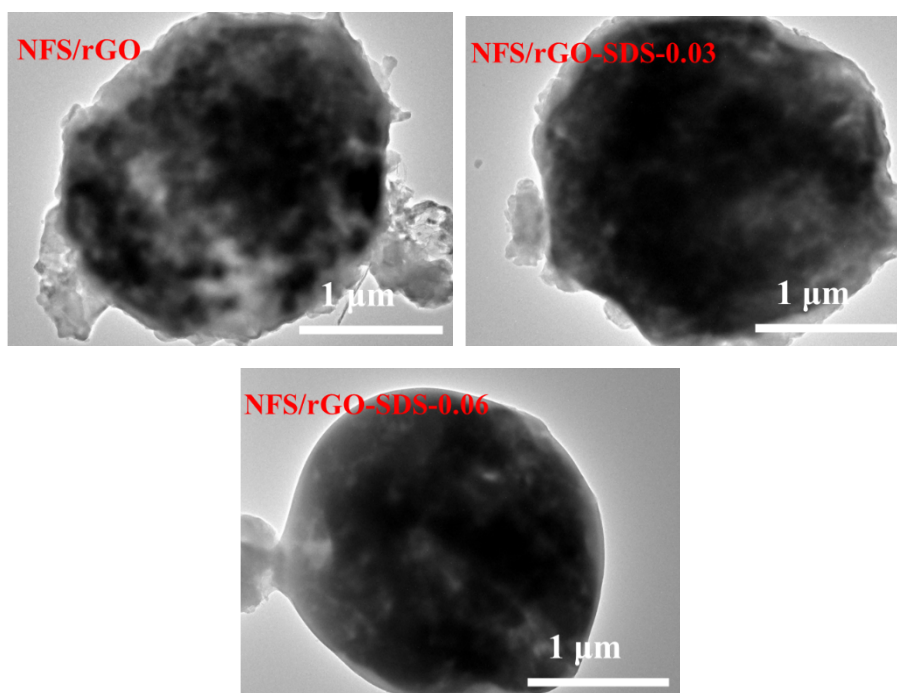

**Fig. S3.** TEM images of NFS/rGO-SDS- $x$ . ( $x=0, 0.03, 0.06$ )

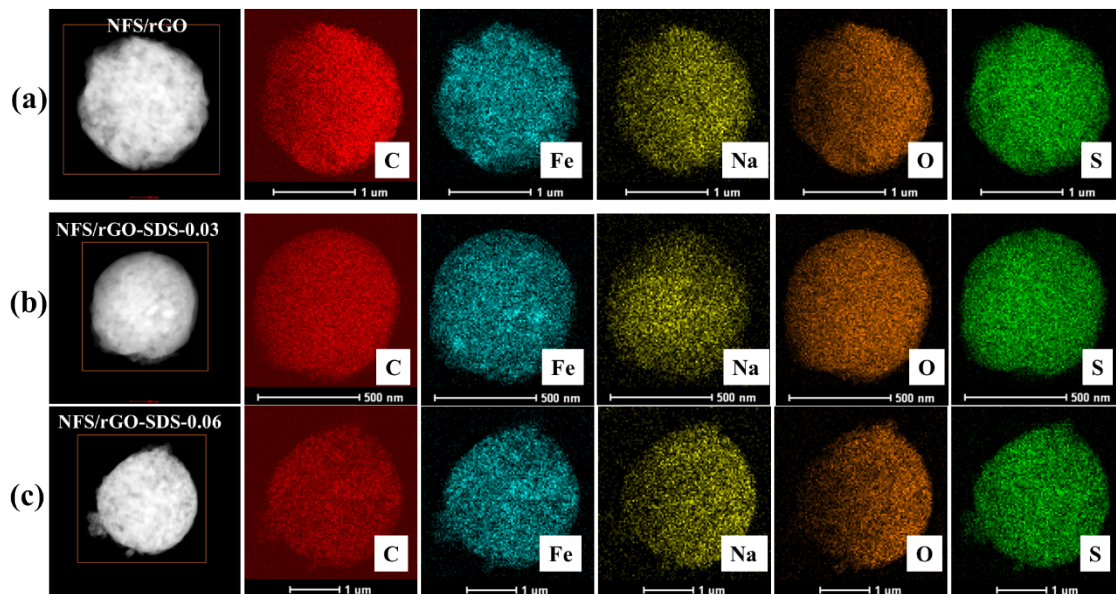

**Fig. S4.** TEM images and EDS elemental mapping of NFS/rGO-SDS- $x$ . ( $x=0, 0.03, 0.06$ )

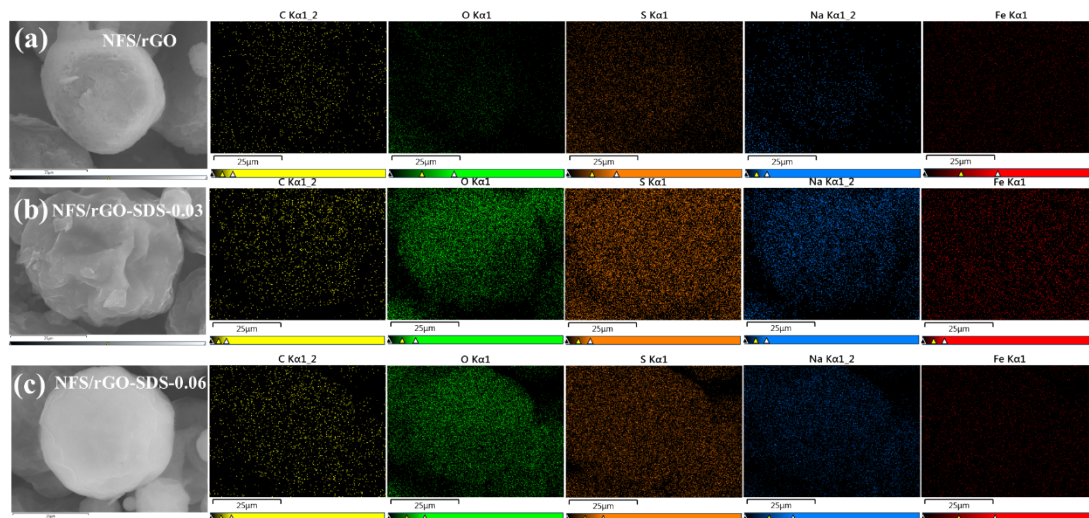

**Fig. S5.** SEM images and EDS elemental mapping of NFS/rGO-SDS- $x$ . ( $x=0, 0.03, 0.06$ )

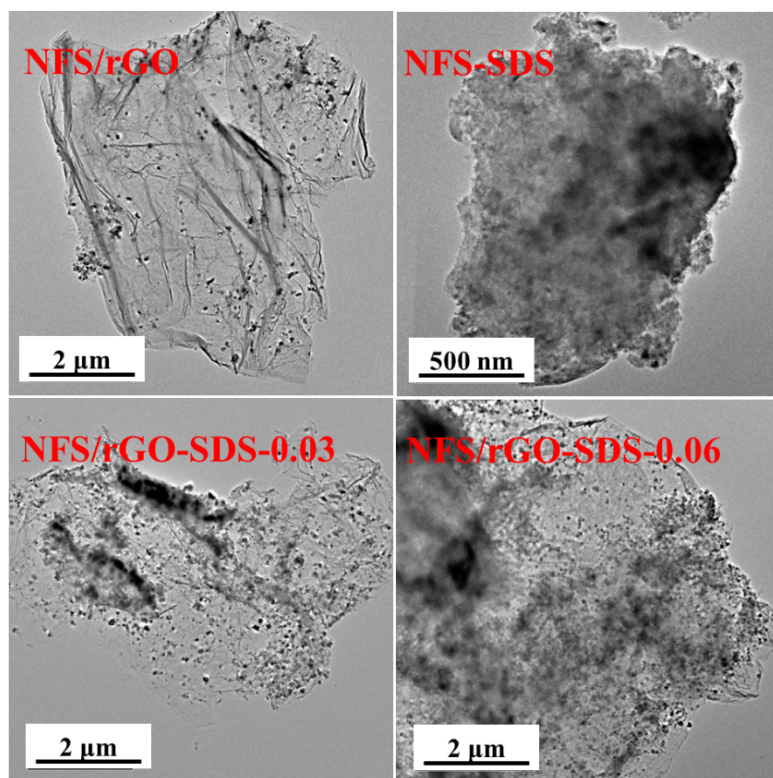

**Fig. S6.** TEM images of the acid-washed samples.

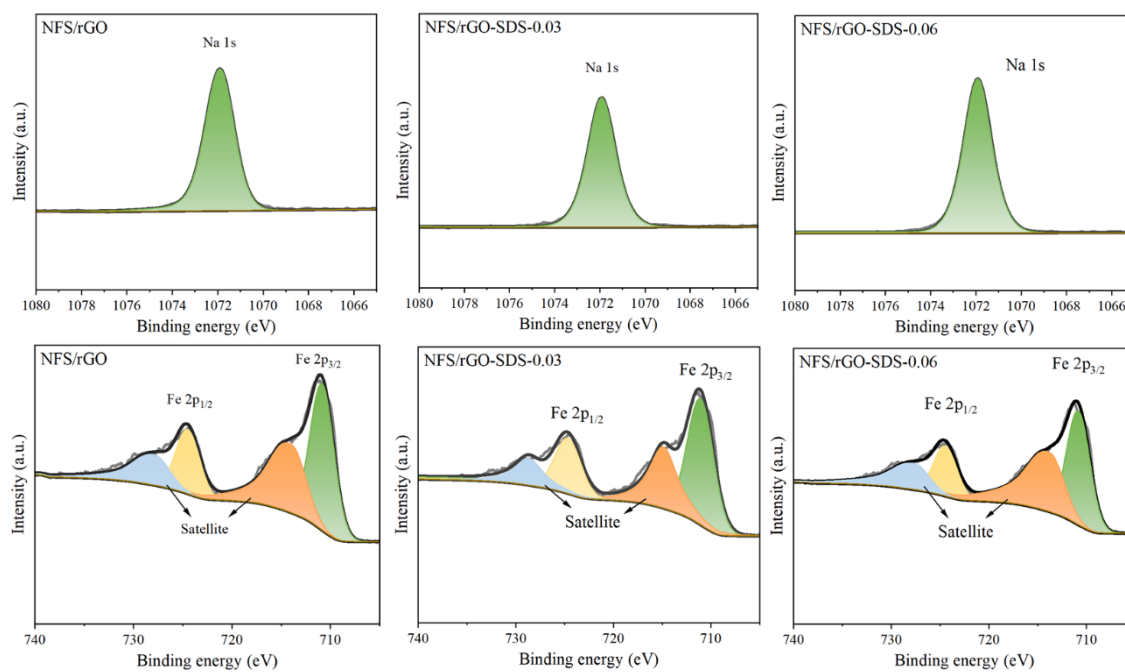

**Fig. S7.** High-resolution XPS spectra of Na 1s and Fe 2p for NFS/rGO-SDS- $x$ . ( $x=0, 0.03, 0.06$ )

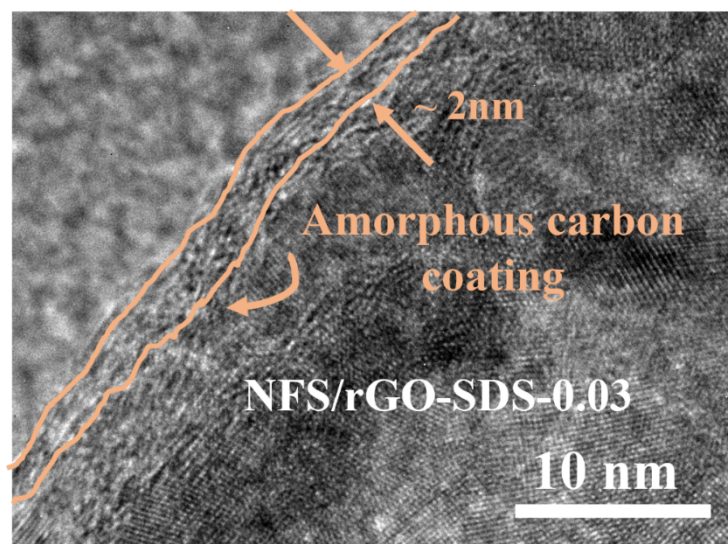

**Fig. S8.** HRTEM image of NFS/rGO-SDS-0.03, showing the amorphous carbon shell and its representative thickness.

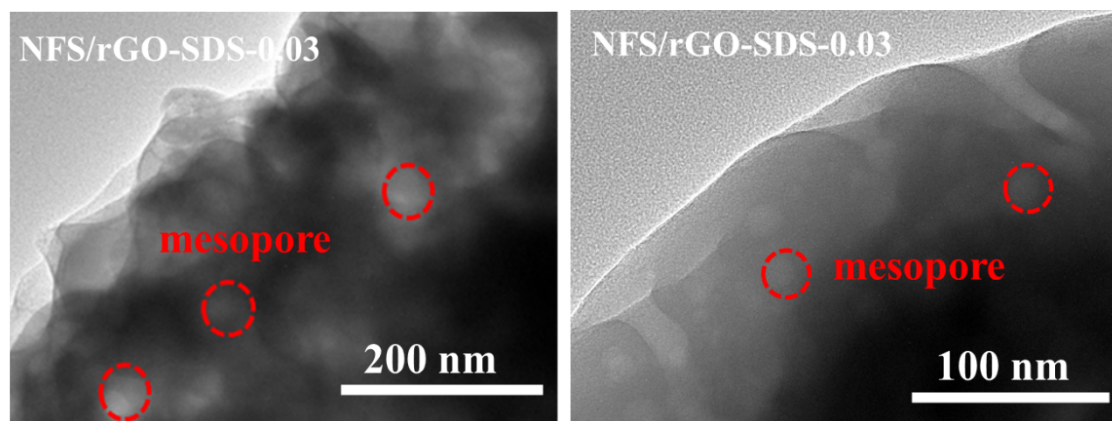

**Fig. S9.** TEM images of NFS/rGO-SDS-0.03.

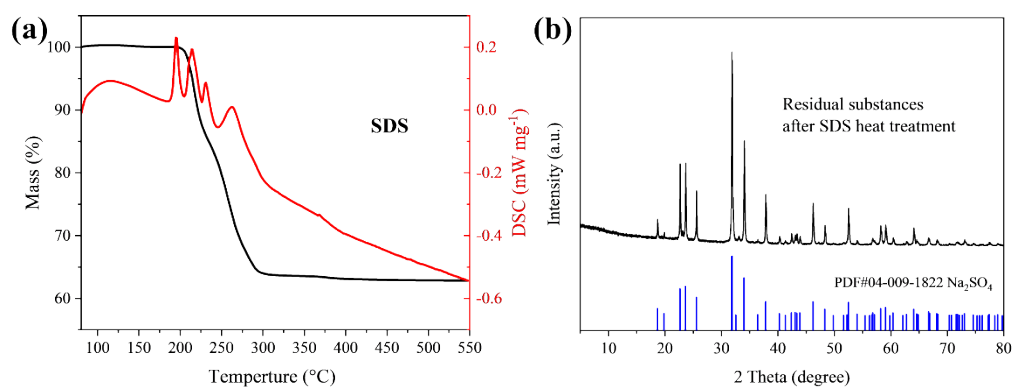

**Fig. S10.** (a) TG-DSC curves of SDS, showing that the main mass-loss/decomposition stage occurs within approximately 200-300 °C; (b) XRD pattern of the residue obtained after thermal treatment of pure SDS under the same heating conditions, indicating Na<sub>2</sub>SO<sub>4</sub> as the dominant crystalline residue.

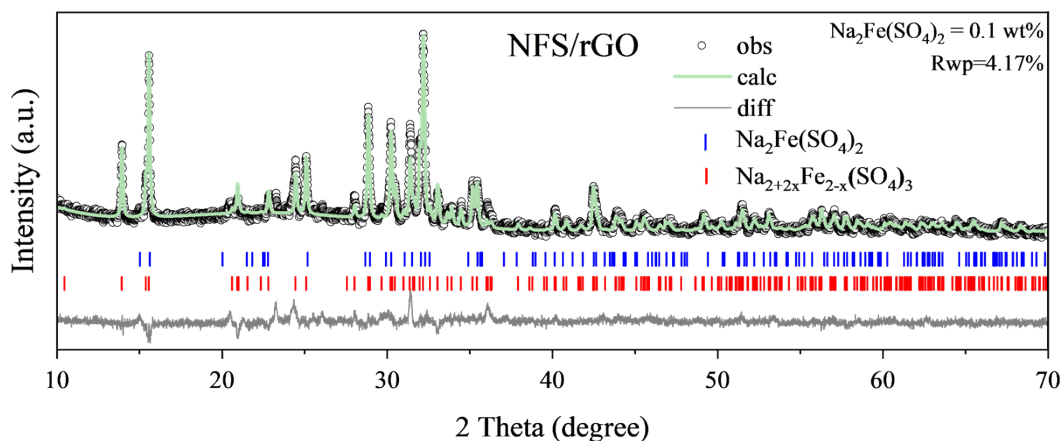

**Fig. S11.** Rietveld refinement XRD pattern of NFS/rGO, with the refined minor  $\text{Na}_2\text{Fe}(\text{SO}_4)_2$  heterophase fraction labelled in the figure.

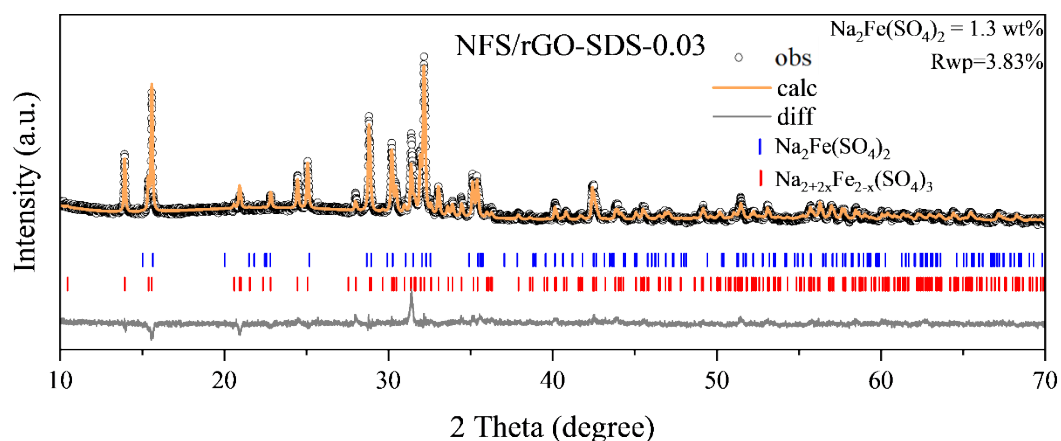

**Fig. S12.** Rietveld refinement XRD pattern of NFS/rGO-SDS-0.03, with the refined minor  $\text{Na}_2\text{Fe}(\text{SO}_4)_2$  heterophase fraction labelled in the figure.

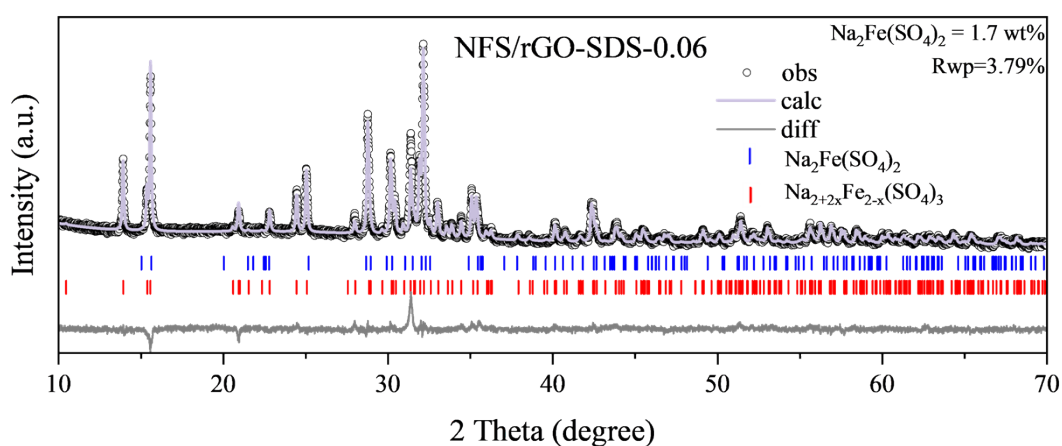

**Fig. S13.** Rietveld refinement XRD pattern of NFS/rGO-SDS-0.06, with the refined minor  $\text{Na}_2\text{Fe}(\text{SO}_4)_2$  heterophase fraction labelled in the figure.

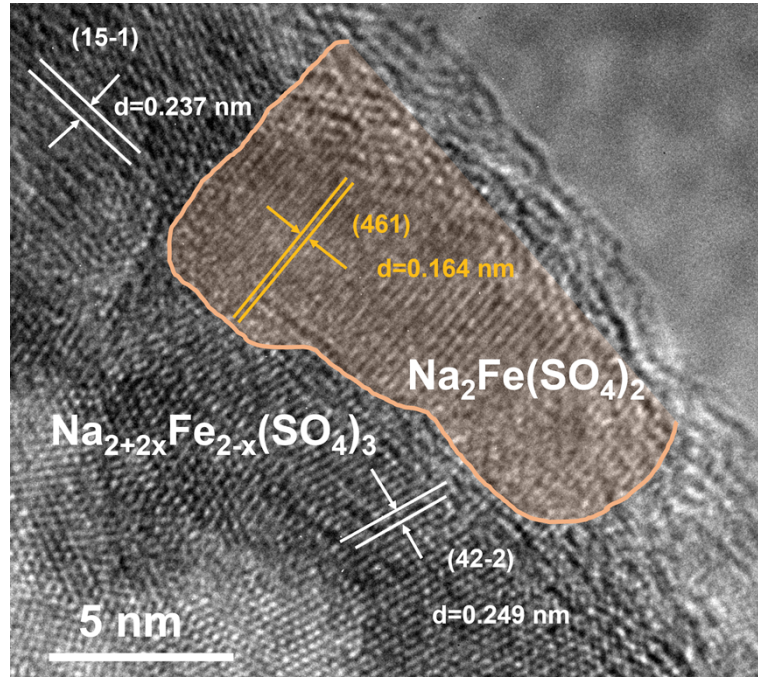

**Fig. S14.** HRTEM image of NFS/rGO-SDS-0.03 focusing on the internal crystalline region, specifically highlighting the lattice fringes of the metastable  $\text{Na}_2\text{Fe}(\text{SO}_4)_2$  heterophase and its distinct boundaries with the main alluaudite matrix.

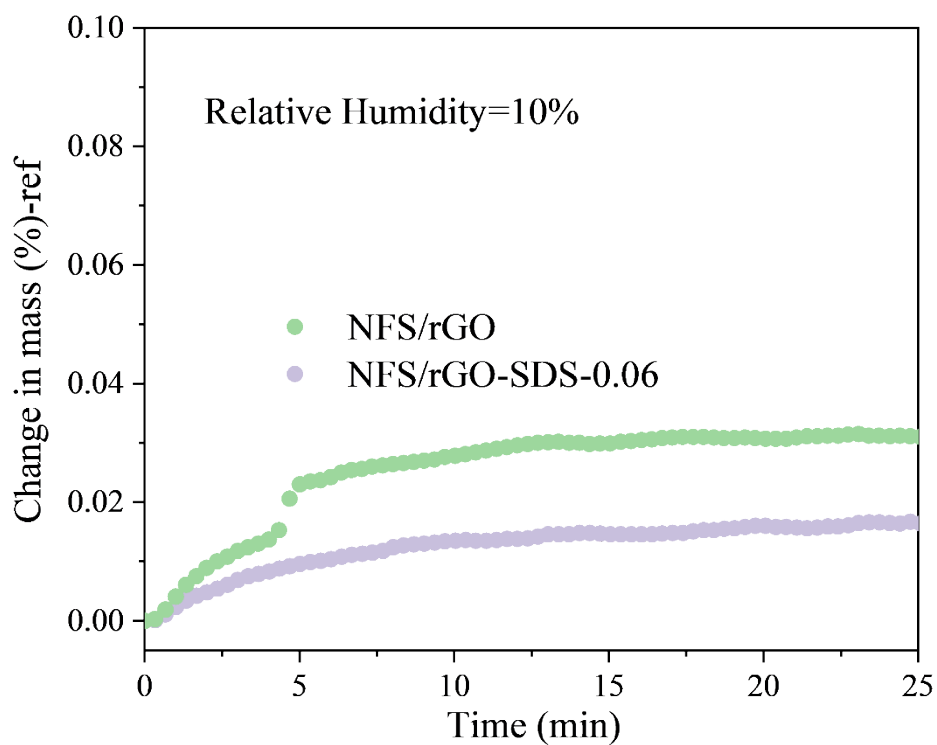

**Fig. S15.** Moisture sorption kinetics test conducted at 10% RH, terminated when  $dm/dt < 0.002\% \text{ min}^{-1}$ .

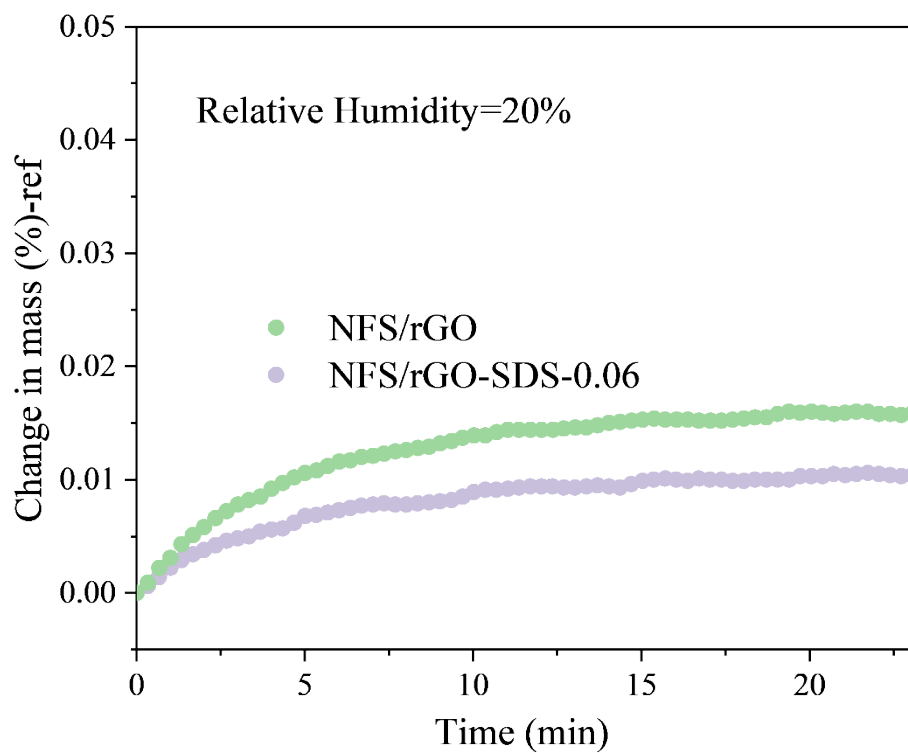

**Fig. S16.** Moisture sorption kinetics test conducted at 20% RH, terminated when  $dm/dt < 0.002\% \text{ min}^{-1}$ .

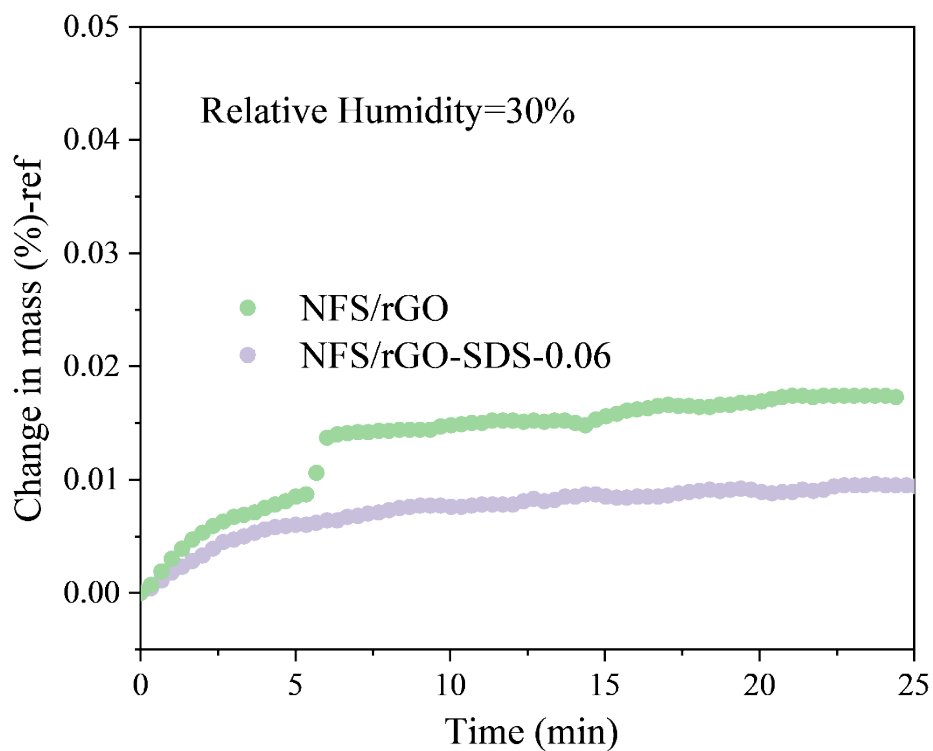

**Fig. S17.** Moisture sorption kinetics test conducted at 30% RH, terminated when  $dm/dt < 0.002\% \text{ min}^{-1}$ .

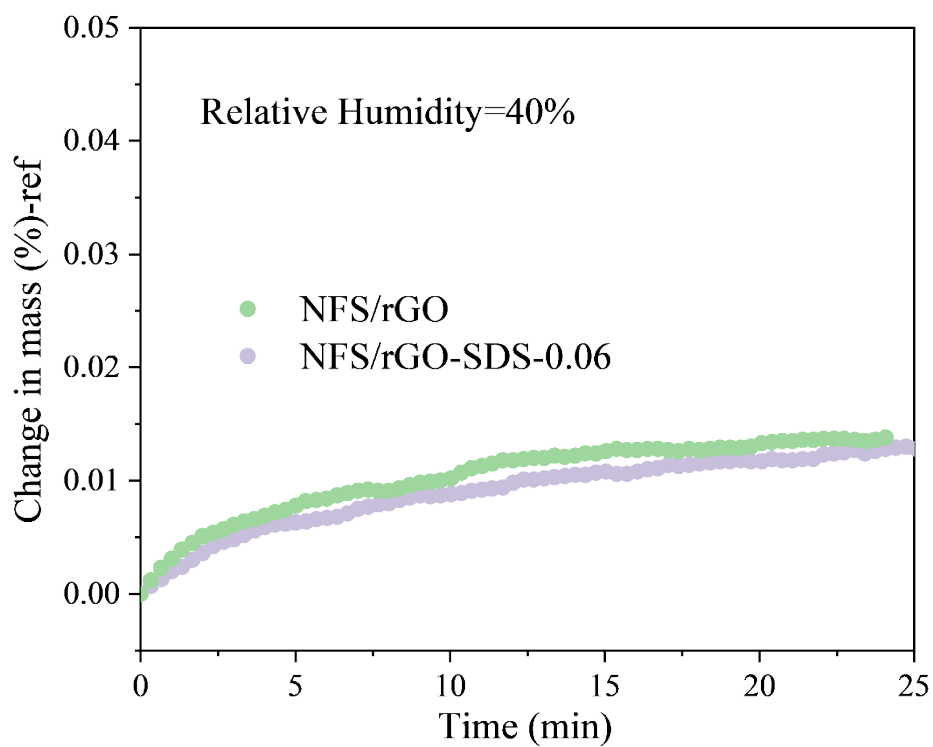

**Fig. S18.** Moisture sorption kinetics test conducted at 40% RH, terminated when  $dm/dt < 0.002\% \text{ min}^{-1}$ .

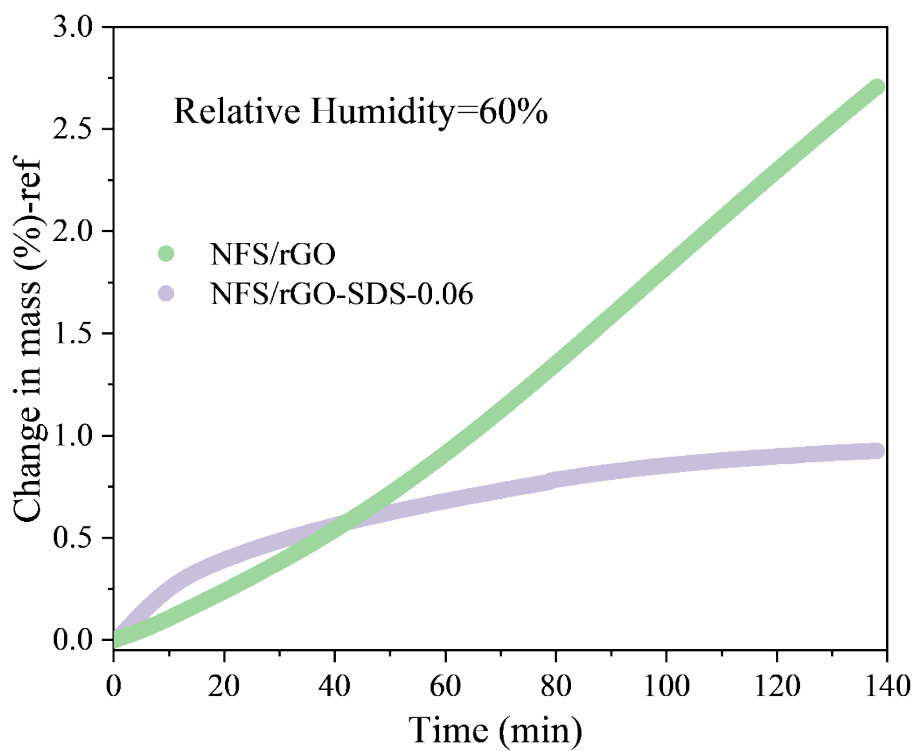

Fig. S19. Moisture sorption kinetics test conducted at 60% RH.

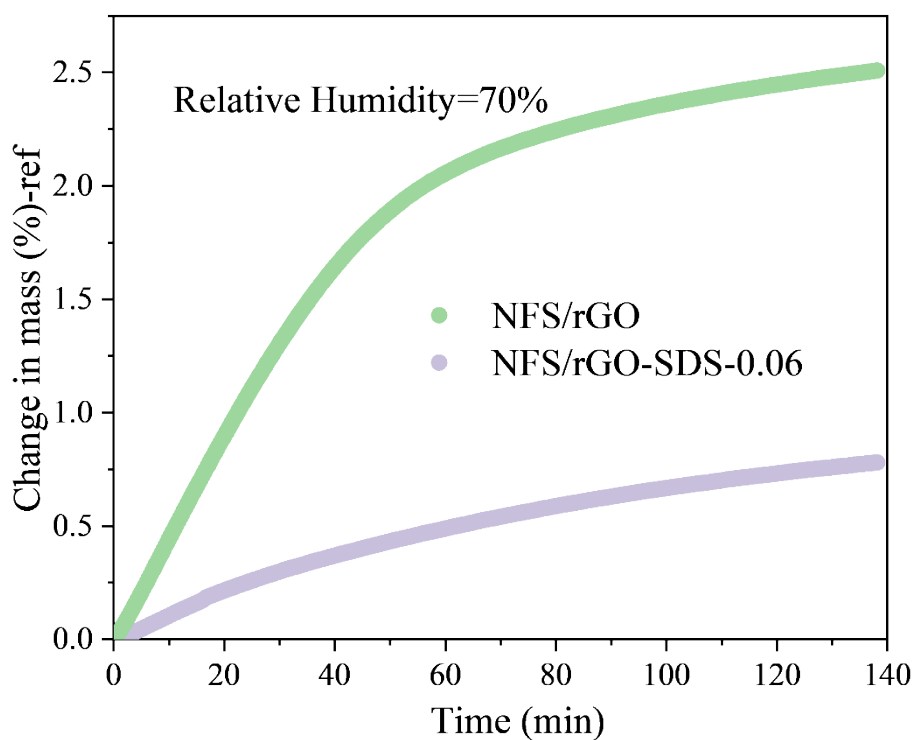

Fig. S20. Moisture sorption kinetics test conducted at 70% RH.

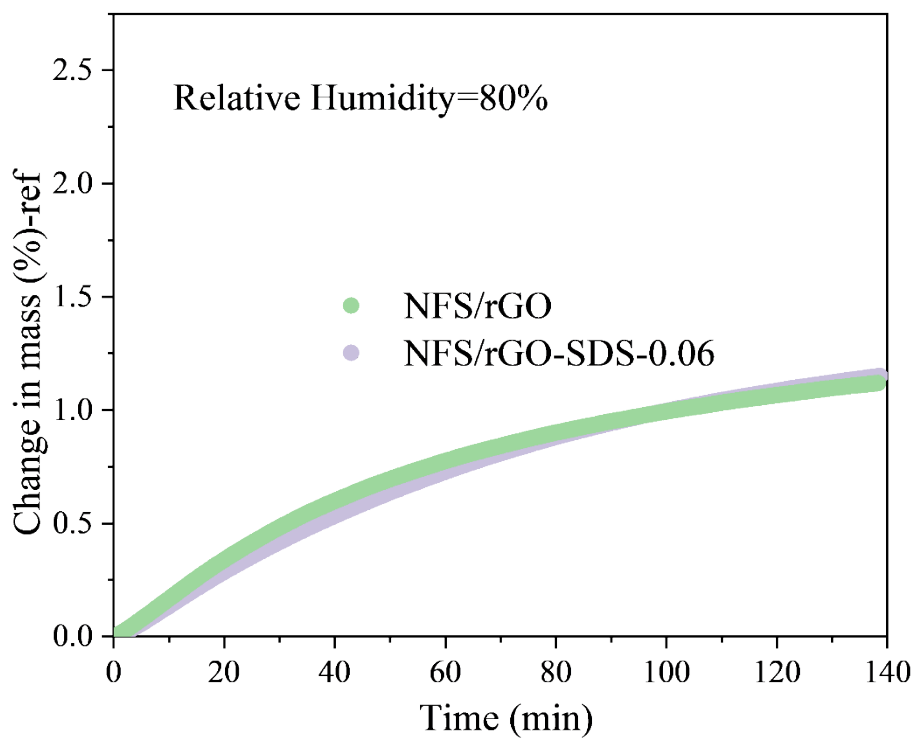

Fig. S21. Moisture sorption kinetics test conducted at 80% RH.

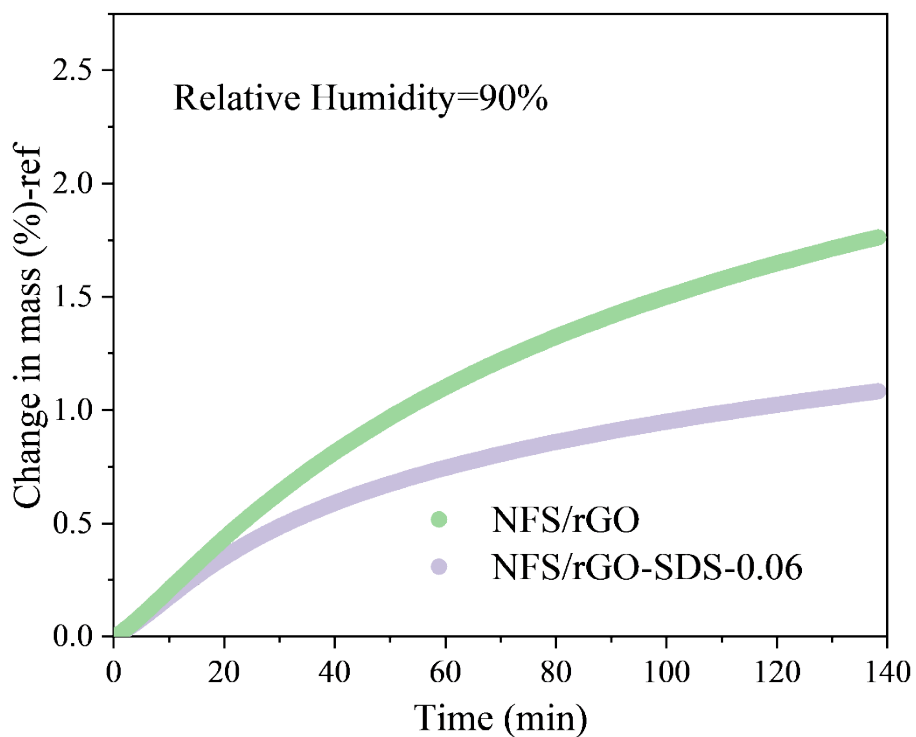

Fig. S22. Moisture sorption kinetics test conducted at 90% RH.

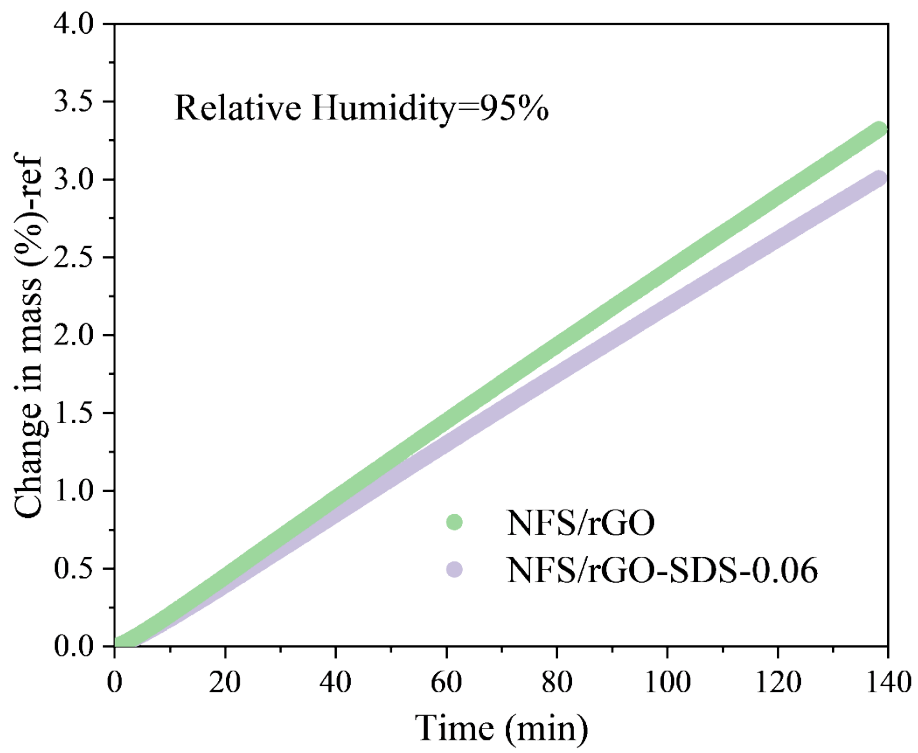

**Fig. S23.** Moisture sorption kinetics test conducted at 95% RH.

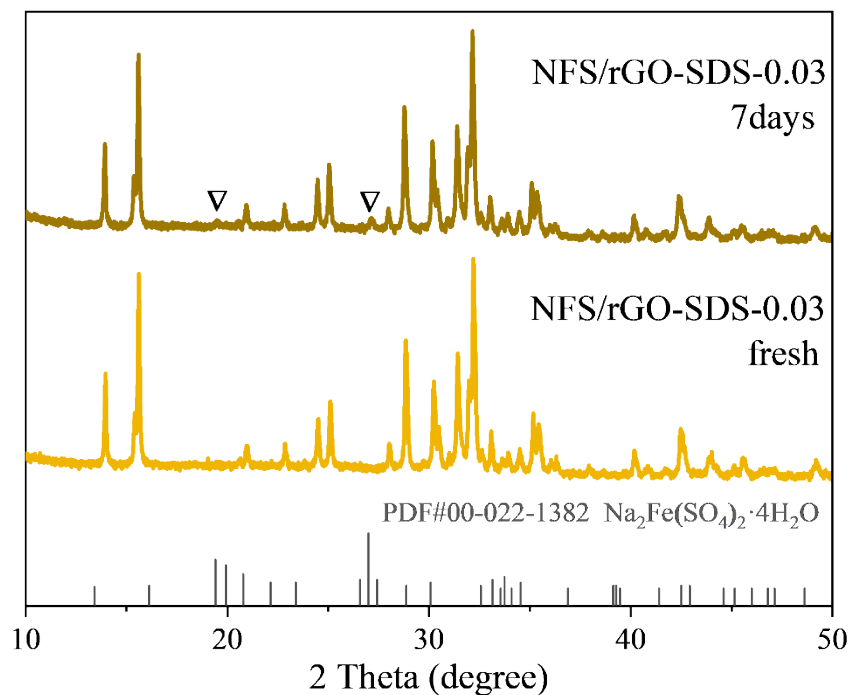

**Fig. S24.** XRD pattern evolution of NFS/rGO-SDS-0.03 exposed to ambient air for 7 days.

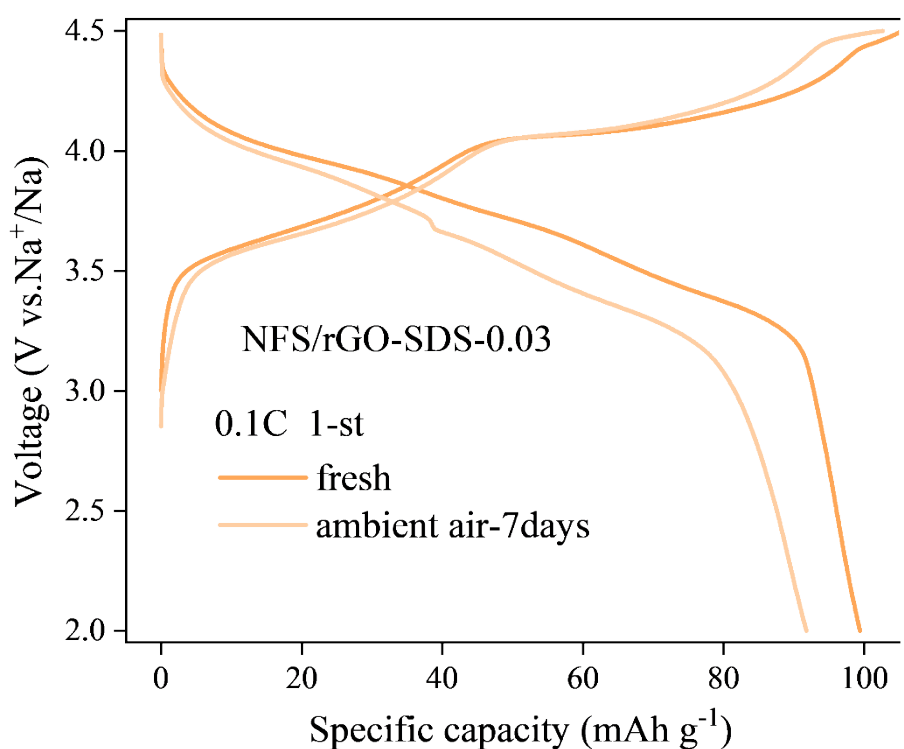

**Fig. S25.** Comparison of charge-discharge curves between the fresh NFS/rGO-SDS-0.03 sample and the sample exposed to ambient air for 7 days.

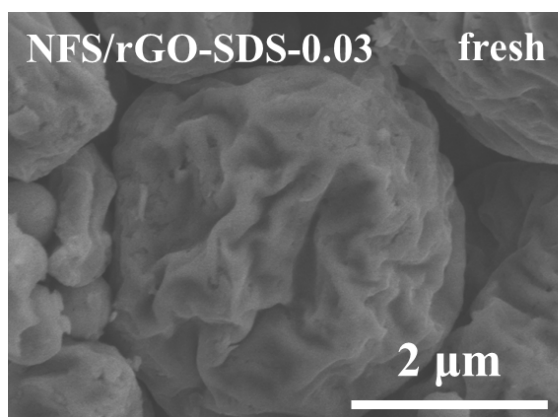

**Fig. S26.** SEM image of the fresh NFS/rGO-SDS-0.03 sample.

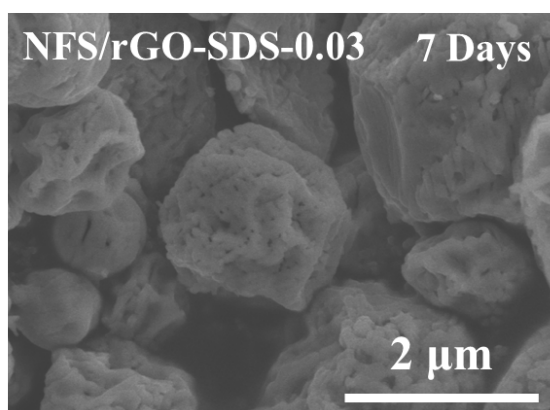

**Fig. S27.** SEM image of NFS/rGO-SDS-0.03 after exposure to air for 7 days.

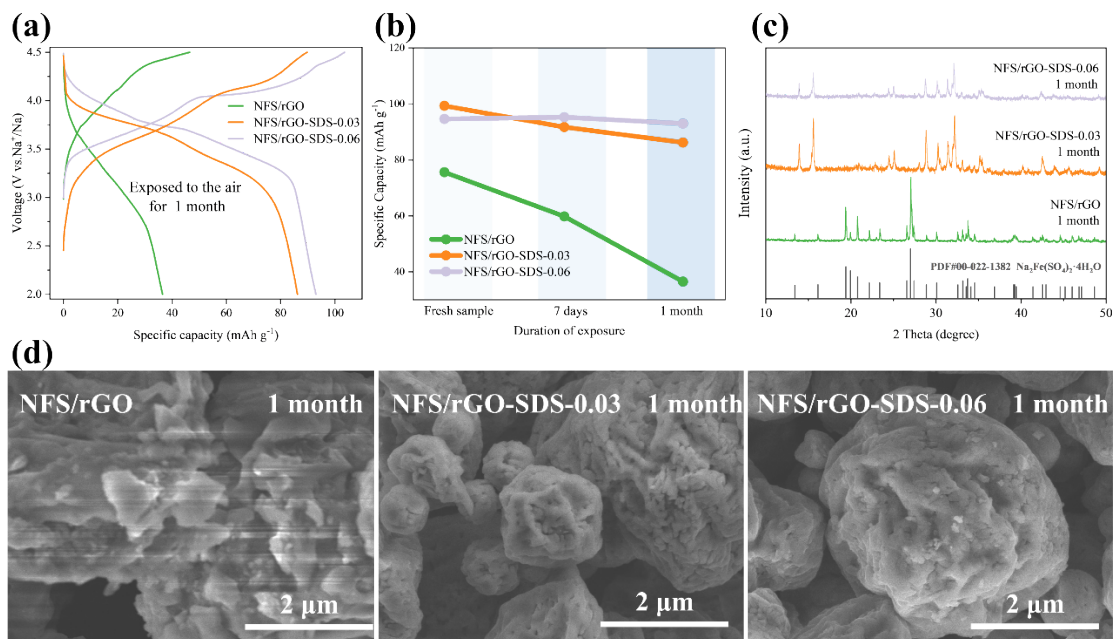

**Fig. S28.** Electrochemical performance, capacity retention, XRD patterns, and SEM images of NFS/rGO, NFS/rGO-SDS-0.03, and NFS/rGO-SDS-0.06 after exposure to ambient air with a relative humidity of approximately 55%RH for one month.

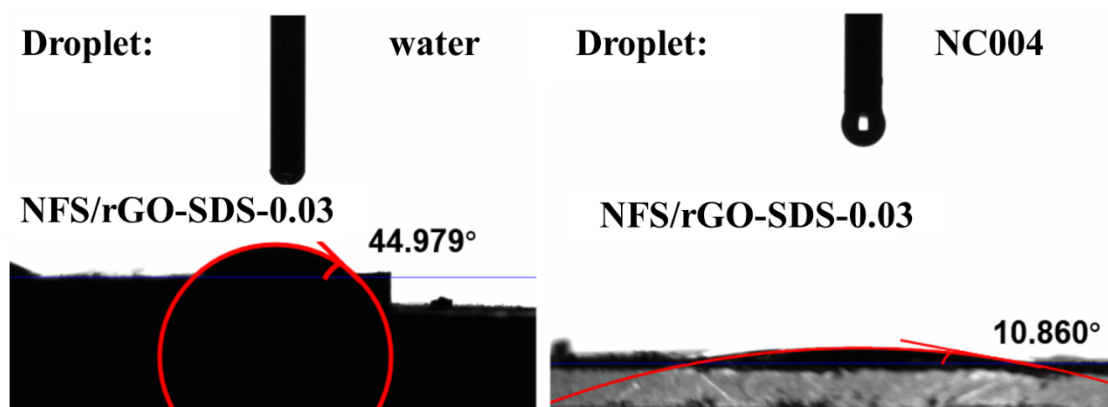

**Fig. S29.** Contact angle measurement images of NFS/rGO-SDS-0.03 toward water and electrolyte NC004.

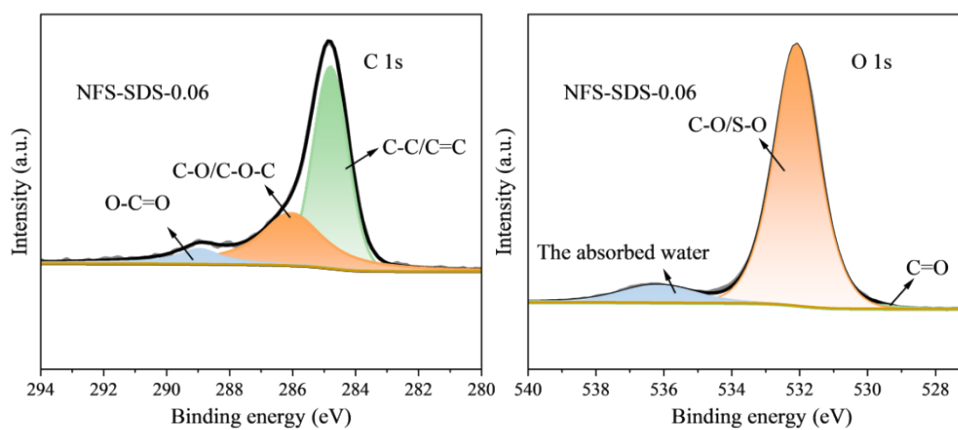

**Fig. S30.** High-resolution XPS spectra of C 1s and O 1s for NFS-SDS-0.06.

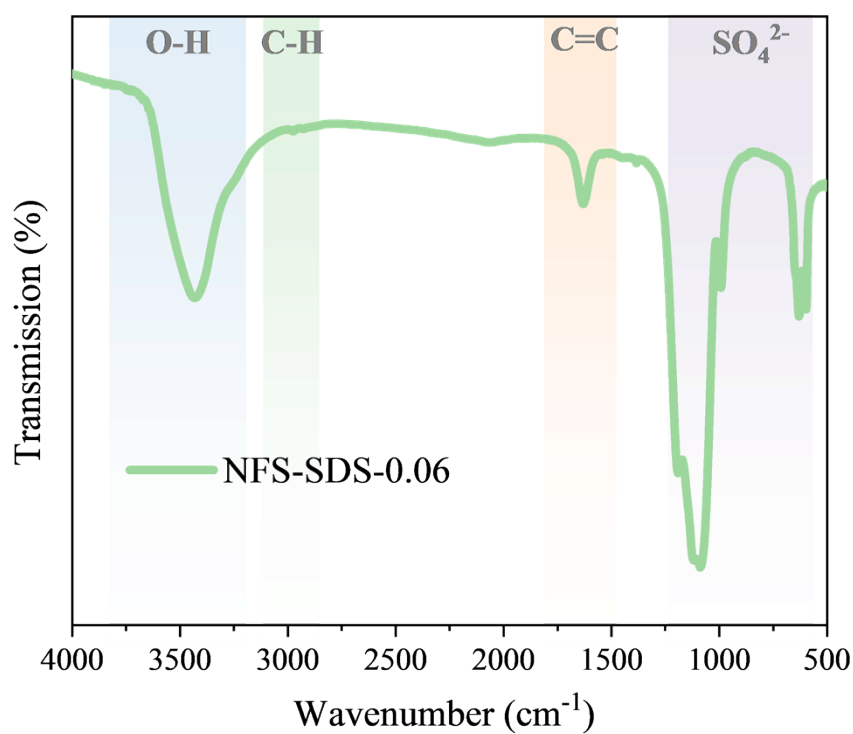

**Fig. S31.** FT-IR spectrum of the NFS-SDS-0.06.

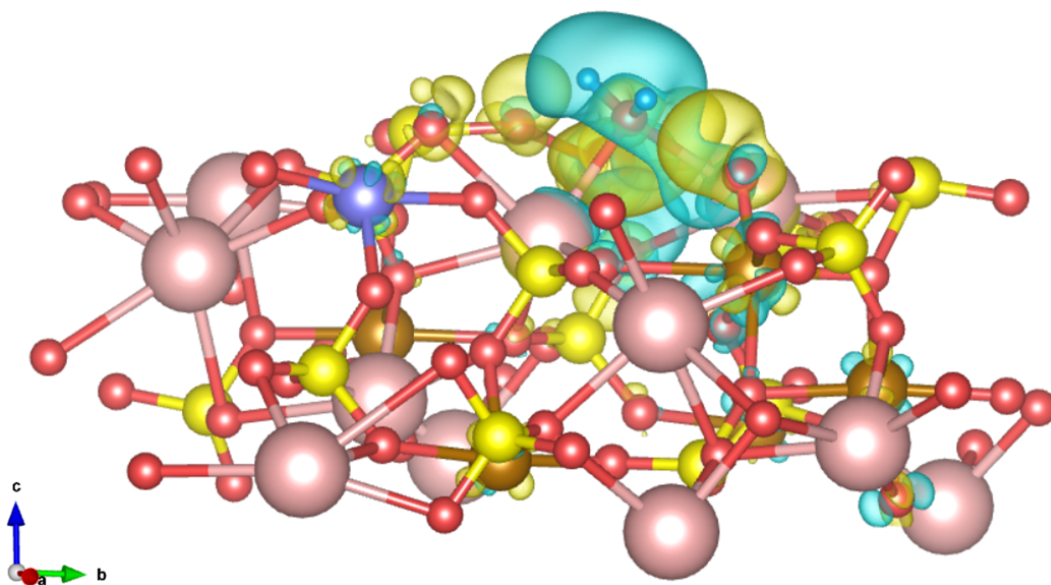

**Fig. S32.** Computational model of H<sub>2</sub>O adsorption energy on bare NFS (NFS|H<sub>2</sub>O).

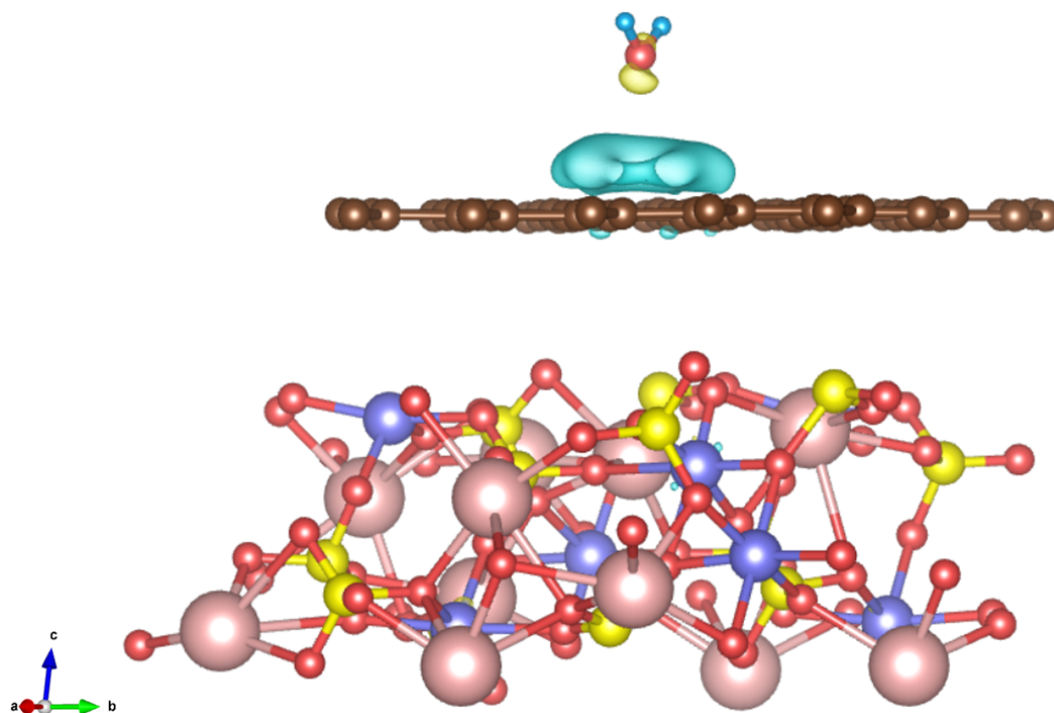

**Fig. S33.** Computational model of H<sub>2</sub>O adsorption energy on the perfect graphite/NFS interface (NFS@G|H<sub>2</sub>O).

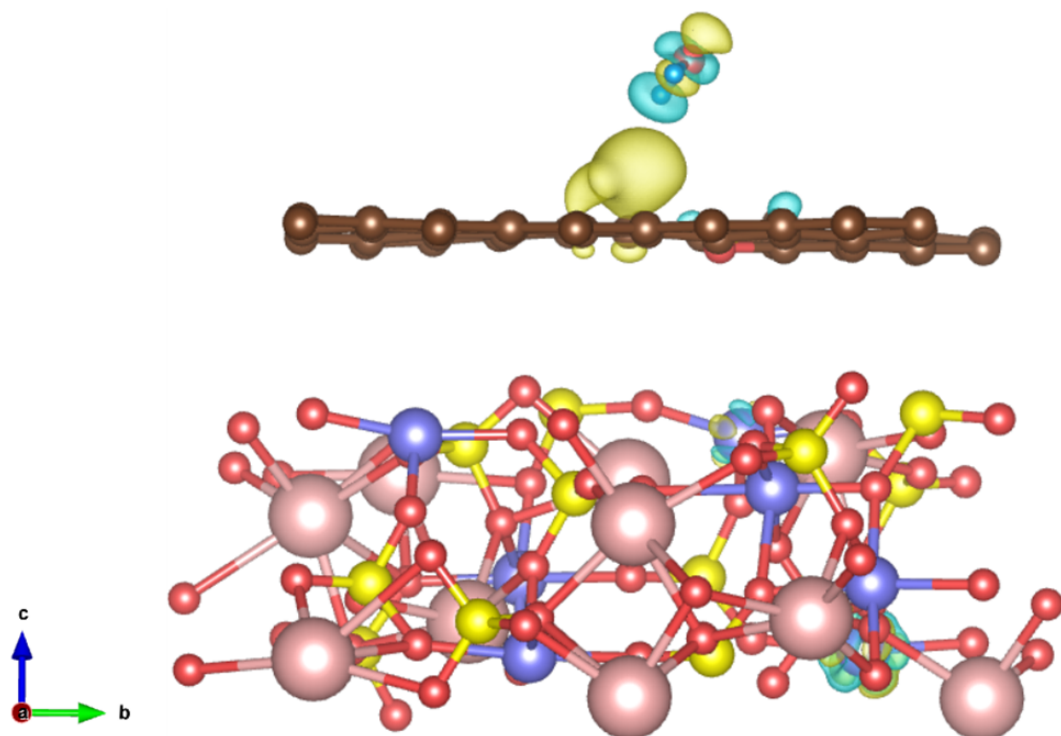

**Fig. S34.** Computational model of H<sub>2</sub>O adsorption energy on the oxygen-containing defective graphite/NFS interface (NFS@G-O|H<sub>2</sub>O).

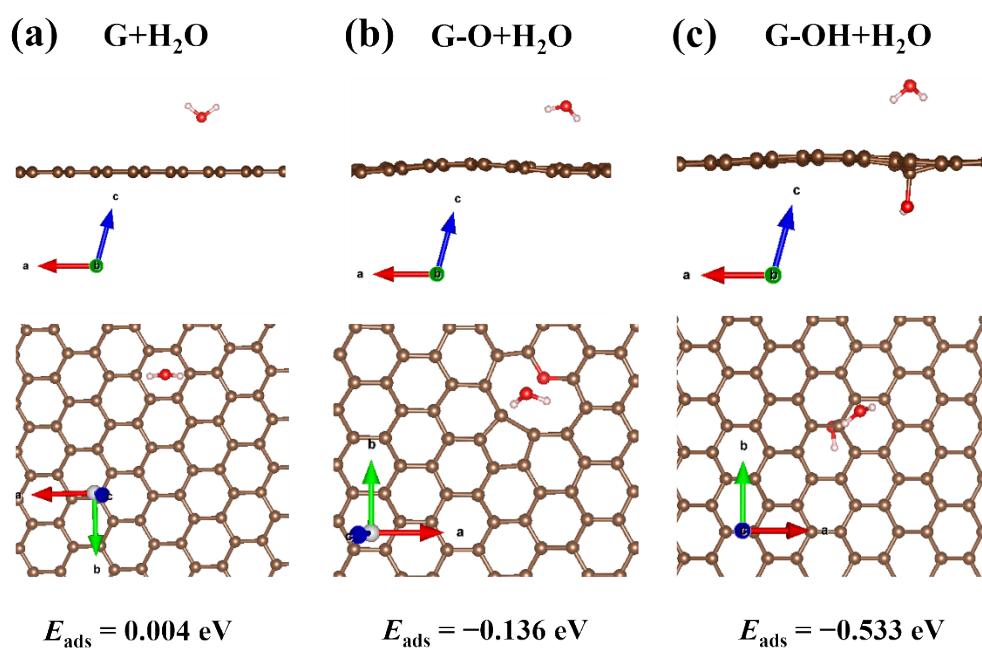

**Fig. S35.** Optimized H<sub>2</sub>O adsorption configurations and calculated adsorption energies on carbon-only surfaces with different surface states: (a) pristine carbon, (b) carbonyl-containing carbon, and (c) hydroxyl-functionalized carbon. The upper and lower panels show the side and top views, respectively. Brown, red, and white spheres represent C, O, and H atoms, respectively.

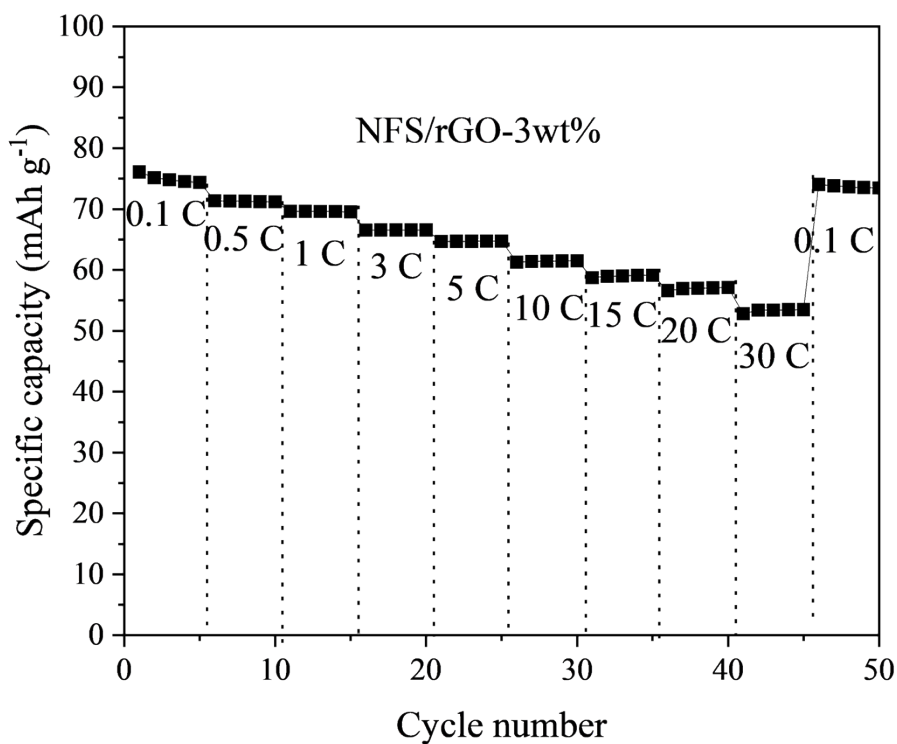

**Fig. S36.** Rate performance of the carbon-matched control sample (NFS/rGO-3 wt%), where the GO content was increased to achieve a carbon load of ~3 wt%.

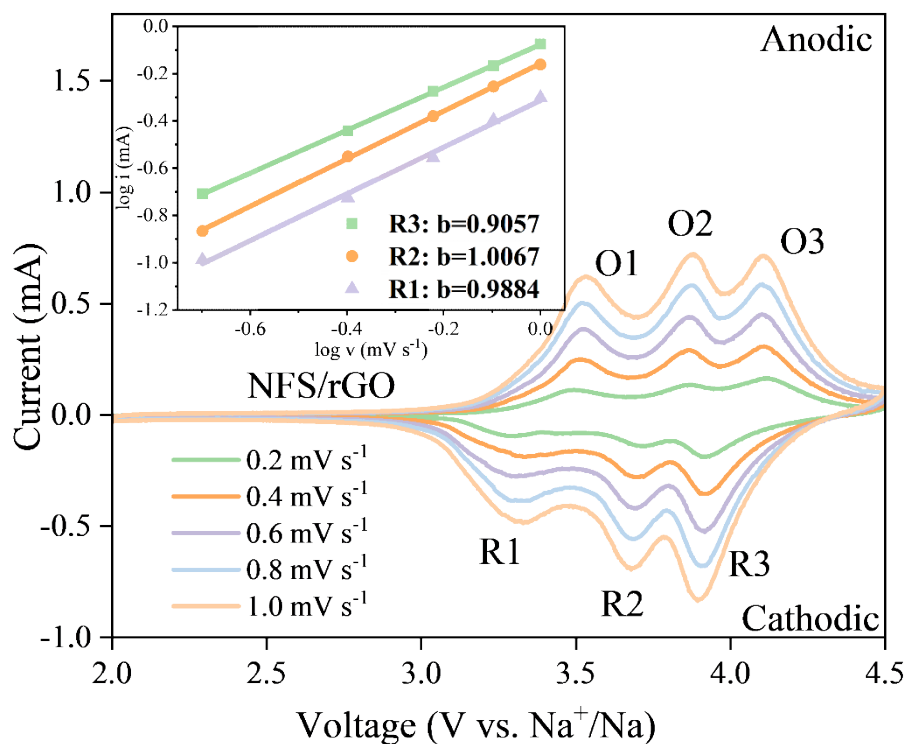

**Fig. S37.** CV curves of NFS/rGO at different scan rates, with the inset showing the  $b$ -value fitting curve and corresponding values.

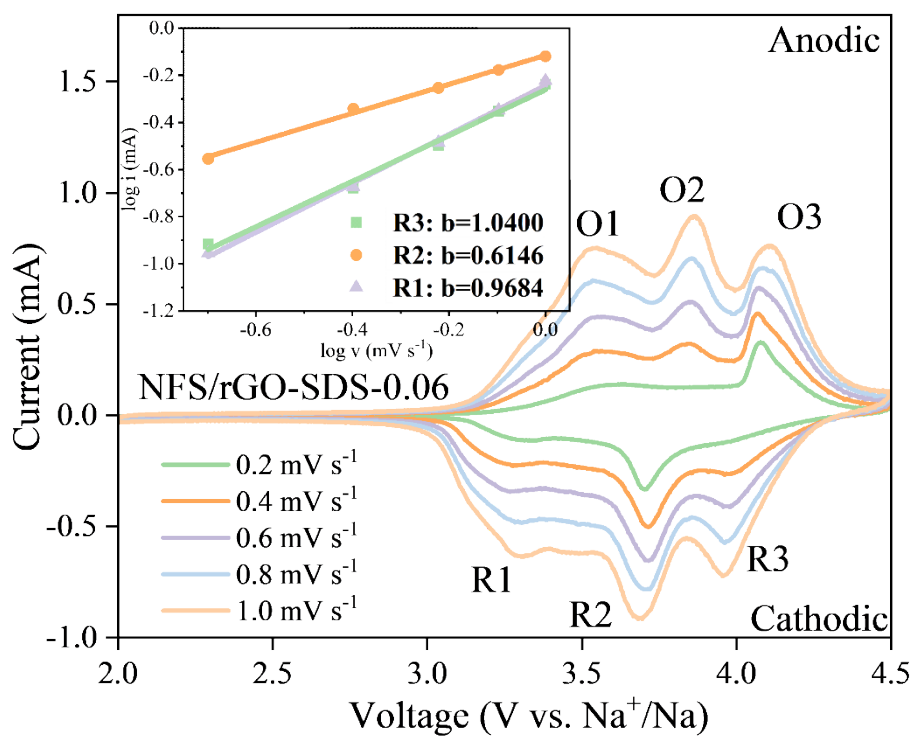

**Fig. S38.** CV curves of NFS/rGO-SDS-0.06 at different scan rates, with the inset showing the  $b$ -value fitting curve and corresponding values.

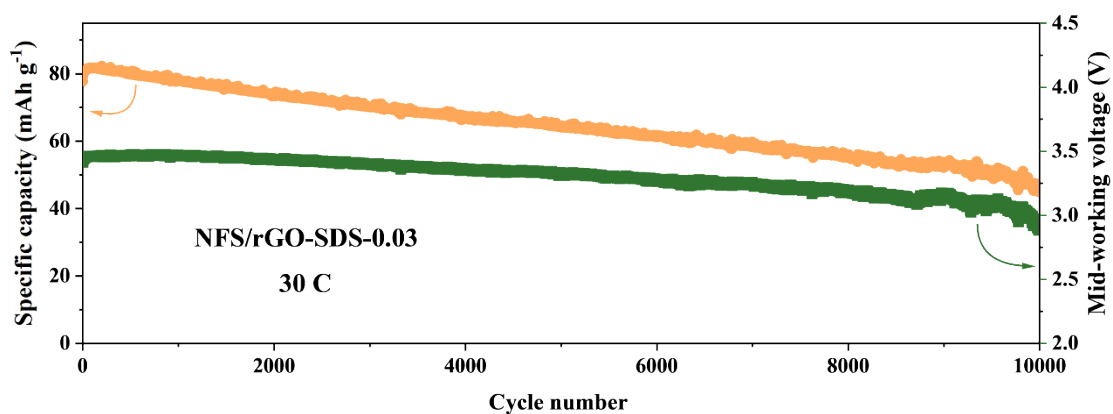

**Fig. S39.** Ultralong cycling performance of NFS/rGO-SDS-0.03 at 30 C for 10000 cycles.

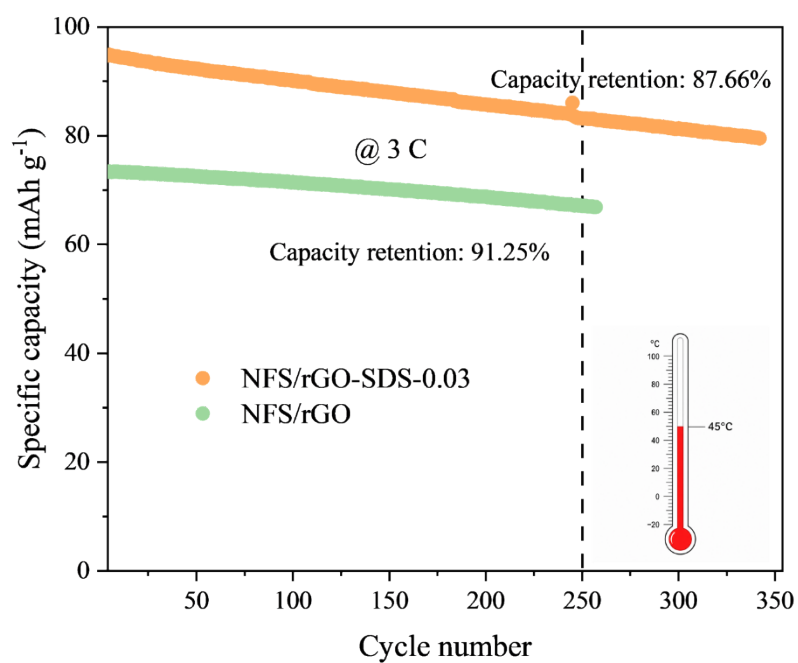

**Fig. S40.** Cycling performance of NFS/rGO and NFS/rGO-SDS-0.03 at 45 °C under 3 C.

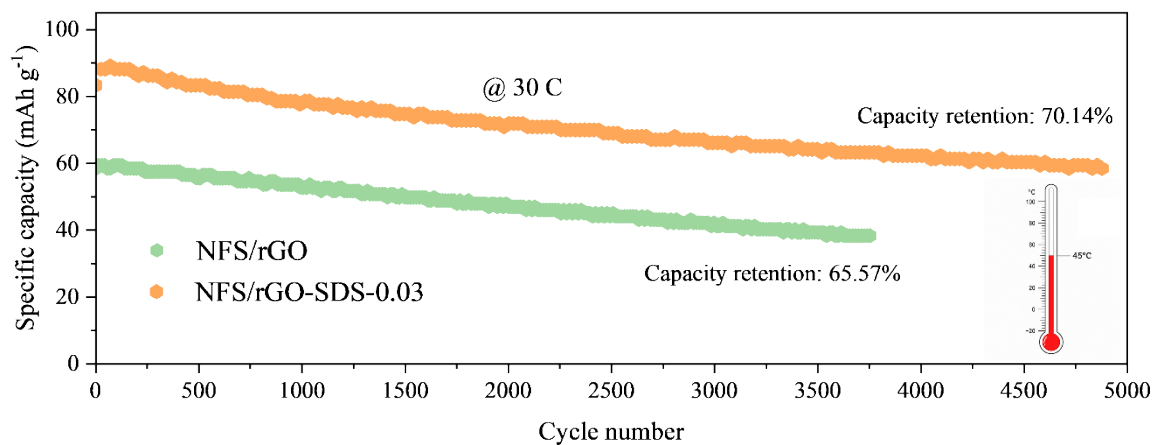

**Fig. S41.** Cycling performance of NFS/rGO and NFS/rGO-SDS-0.03 at 45 °C under 30 C.

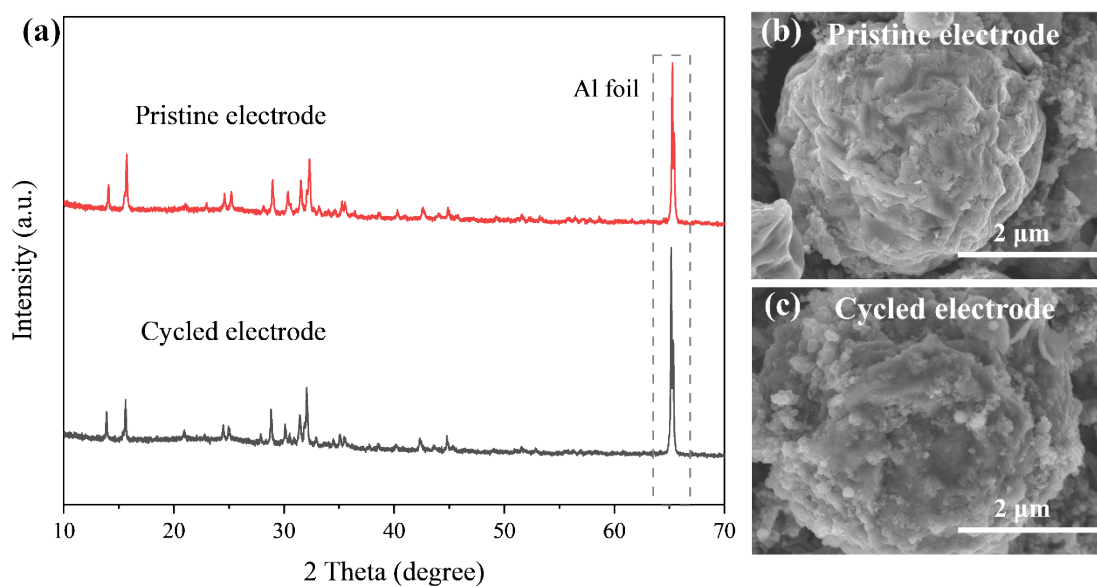

**Fig. S42.** *Ex situ* XRD patterns and SEM images of the NFS/rGO-SDS-0.03 electrode before and after cycling. (a) XRD patterns of the pristine and cycled electrodes. SEM images of the (b) pristine and (c) cycled electrodes.

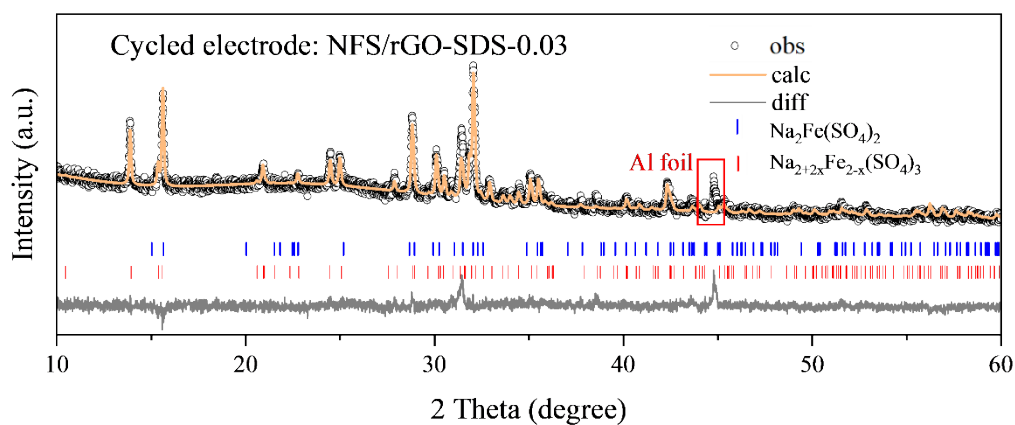

**Fig. S43.** Rietveld refinement of the *ex situ* XRD pattern of the cycled NFS/rGO-SDS-0.03 electrode.

**Table S1.** Atomic percentages obtained from EDS elemental mapping

| Elements | NFS/rGO | NFS/rGO-SDS-0.03 | NFS/rGO-SDS-0.06 |
|----------|---------|------------------|------------------|
| O        | 54.4    | 46.2             | 48.3             |
| C        | 22.4    | 24.8             | 24.3             |
| S        | 9.5     | 12.0             | 10.9             |
| Na       | 7.1     | 8.7              | 8.9              |
| Fe       | 6.6     | 8.2              | 7.6              |
| Na/Fe    | 1.08    | 1.06             | 1.17             |

**Table S2.** Four-point probe resistivity test results

|                                                 | NFS/rGO      | NFS/rGO-SDS-0.03 | NFS/rGO-SDS-0.06 |
|-------------------------------------------------|--------------|------------------|------------------|
| Volume Resistivity ( $\Omega \cdot \text{cm}$ ) | Open Circuit | 88.98            | 71.68            |

**Table S3.** BET measurement data

|                                                               | NFS/rGO | NFS/rGO-SDS-0.03 | NFS/rGO-SDS-0.06 |
|---------------------------------------------------------------|---------|------------------|------------------|
| BET Surface Area ( $\text{m}^2 \text{g}^{-1}$ )               | 7.54    | 11.67            | 12.87            |
| Total pore volume of pores<br>( $\text{cm}^3 \text{g}^{-1}$ ) | 0.036   | 0.045            | 0.057            |
| BJH Desorption average<br>pore diameter (4V/A) (nm)           | 8.67    | 4.55             | 6.40             |

**Table S4.** XPS C 1s high-resolution spectrum and its corresponding components

| Chemical species (at%) | NFS/rGO | NFS/rGO-SDS-0.03 | NFS/rGO-SDS-0.06 |
|------------------------|---------|------------------|------------------|
| C-C ( $\text{sp}^2$ )  | 15.83   | 16.25            | 17.71            |
| C-C ( $\text{sp}^3$ )  | 10.68   | 6.70             | 6.62             |
| C-O/C-O-C              | 6.28    | 6.54             | 6.63             |
| O-C=O                  | 4.96    | 4.82             | 2.31             |

**Table S5.** Atomic parameters of  $\text{Na}_{2+2x}\text{Fe}_{2-x}(\text{SO}_4)_3$  refined from XRD Rietveld refinement of NFS/rGO.

| Formula                            |          | NFS/rGO    |          |       |      |
|------------------------------------|----------|------------|----------|-------|------|
| Crystal system                     |          | Monoclinic |          |       |      |
| Space group                        |          | C1 2/c     |          |       |      |
| a (Å)                              |          | 12.65946   |          |       |      |
| b (Å)                              |          | 12.76448   |          |       |      |
| c (Å)                              |          | 6.51126    |          |       |      |
| $\beta$ (°)                        |          | 115.55614  |          |       |      |
| Unit cell volume (Å <sup>3</sup> ) |          | 949.223    |          |       |      |
| Atom                               | x        | y          | z        | Occ.  | Mult |
| S1                                 | 0.50000  | 0.21433    | 0.75000  | 0.500 | 4    |
| Na1                                | 0.27475  | 0.34519    | 0.37050  | 0.124 | 8    |
| Fe                                 | 0.27475  | 0.34519    | 0.37050  | 0.876 | 8    |
| O1                                 | 0.08202  | 0.31139    | 0.10664  | 1.000 | 8    |
| O2                                 | 0.05621  | 0.19707    | 0.47295  | 1.000 | 8    |
| S2                                 | 0.23072  | 0.10439    | 0.11060  | 1.000 | 8    |
| O3                                 | 0.28452  | 0.16393    | 0.37857  | 1.000 | 8    |
| O4                                 | 0.16901  | 0.01736    | 0.08692  | 1.000 | 8    |
| O5                                 | 0.29860  | 0.35126    | -0.00373 | 1.000 | 8    |
| O6                                 | 0.53381  | -0.01664   | 0.50508  | 1.000 | 8    |
| Na2                                | 0.00000  | 0.74576    | 0.25000  | 0.500 | 4    |
| Na3                                | 0.35711  | 0.07913    | 0.12902  | 0.681 | 8    |
| Na4                                | -0.01765 | 0.07968    | 0.07728  | 0.453 | 8    |

**Table S6.** Atomic parameters of  $\text{Na}_{2+2x}\text{Fe}_{2-x}(\text{SO}_4)_3$  refined from XRD Rietveld refinement of NFS/rGO-SDS-0.03.

| Formula                            |          | NFS/rGO-SDS-0.03 |          |       |      |
|------------------------------------|----------|------------------|----------|-------|------|
| Crystal system                     |          | Monoclinic       |          |       |      |
| Space group                        |          | C1 2/c           |          |       |      |
| a (Å)                              |          | 12.66910         |          |       |      |
| b (Å)                              |          | 12.78410         |          |       |      |
| c (Å)                              |          | 6.52392          |          |       |      |
| $\beta$ (°)                        |          | 115.54768        |          |       |      |
| Unit cell volume (Å <sup>3</sup> ) |          | 953.324          |          |       |      |
| Atom                               | x        | y                | z        | Occ.  | Mult |
| S1                                 | 0.50000  | 0.22050          | 0.75000  | 0.500 | 4    |
| Na1                                | 0.27339  | 0.34416          | 0.37105  | 0.146 | 8    |
| Fe                                 | 0.27339  | 0.34416          | 0.37105  | 0.854 | 8    |
| O1                                 | 0.08856  | 0.31721          | 0.12658  | 1.000 | 8    |
| O2                                 | 0.03622  | 0.19616          | 0.47445  | 1.000 | 8    |
| S2                                 | 0.23028  | 0.10015          | 0.11400  | 1.000 | 8    |
| O3                                 | 0.29697  | 0.16751          | 0.39800  | 1.000 | 8    |
| O4                                 | 0.17046  | 0.01189          | 0.09997  | 1.000 | 8    |
| O5                                 | 0.28665  | 0.35062          | -0.00797 | 1.000 | 8    |
| O6                                 | 0.53391  | -0.01441         | 0.48153  | 1.000 | 8    |
| Na2                                | 0.00000  | 0.74557          | 0.25000  | 0.500 | 4    |
| Na3                                | 0.35856  | 0.08985          | 0.11584  | 0.703 | 8    |
| Na4                                | -0.04682 | 0.08063          | 0.05973  | 0.495 | 8    |

**Table S7.** Atomic parameters of  $\text{Na}_{2+2x}\text{Fe}_{2-x}(\text{SO}_4)_3$  refined from XRD Rietveld refinement of NFS/rGO-SDS-0.06.

| Formula                            |          | NFS/rGO-SDS-0.06 |         |       |      |
|------------------------------------|----------|------------------|---------|-------|------|
| Crystal system                     |          | Monoclinic       |         |       |      |
| Space group                        |          | C1 2/c           |         |       |      |
| a (Å)                              |          | 12.67619         |         |       |      |
| b (Å)                              |          | 12.79892         |         |       |      |
| c (Å)                              |          | 6.53525          |         |       |      |
| $\beta$ (°)                        |          | 115.56546        |         |       |      |
| Unit cell volume (Å <sup>3</sup> ) |          | 956.479          |         |       |      |
| Atom                               | x        | y                | z       | Occ.  | Mult |
| S1                                 | 0.50000  | 0.22275          | 0.75000 | 0.500 | 4    |
| Na1                                | 0.27364  | 0.34467          | 0.37133 | 0.144 | 8    |
| Fe                                 | 0.27364  | 0.34467          | 0.37133 | 0.856 | 8    |
| O1                                 | 0.09101  | 0.31758          | 0.13270 | 1.000 | 8    |
| O2                                 | 0.03173  | 0.19520          | 0.47322 | 1.000 | 8    |
| S2                                 | 0.23155  | 0.10061          | 0.11483 | 1.000 | 8    |
| O3                                 | 0.30421  | 0.17541          | 0.41100 | 1.000 | 8    |
| O4                                 | 0.17214  | 0.01459          | 0.09683 | 1.000 | 8    |
| O5                                 | 0.28678  | 0.35304          | 0.00028 | 1.000 | 8    |
| O6                                 | 0.53284  | -0.01353         | 0.46978 | 1.000 | 8    |
| Na2                                | 0.0000   | 0.74767          | 0.25000 | 0.500 | 4    |
| Na3                                | 0.35372  | 0.08915          | 0.10839 | 0.686 | 8    |
| Na4                                | -0.05780 | 0.07930          | 0.05007 | 0.494 | 8    |

**Table S8.** DFT calculation results: formation energies of various structural model

| Structural model | Formation Energy ( $E_f$ ) (eV nm <sup>-2</sup> ) |
|------------------|---------------------------------------------------|
| NFS@G            | -0.12                                             |
| NFS@G-O          | 0.15                                              |
| NFS@G-OH         | -0.32                                             |

**Table S9.** DFT calculation results: adsorption energies of water molecules on various structural model

| Structural model          | Adsorption Energy ( $E_{ads}$ ) (eV) |
|---------------------------|--------------------------------------|
| NFS H <sub>2</sub> O      | -0.79                                |
| NFS@G H <sub>2</sub> O    | -0.02                                |
| NFS@G-O H <sub>2</sub> O  | -0.43                                |
| NFS@G-OH H <sub>2</sub> O | -0.06                                |
| G H <sub>2</sub> O        | 0.004                                |
| G-O H <sub>2</sub> O      | -0.136                               |
| G-OH H <sub>2</sub> O     | -0.533                               |

**Note:** G, G–O, and G–OH denote pristine carbon, carbonyl-containing carbon, and hydroxyl-functionalized carbon, respectively. NFS@G, NFS@G–O, and NFS@G–OH represent NFS surfaces covered by the corresponding carbon layers.

**Table S10.** EIS fitting parameters of NFS/rGO, NFS/rGO-SDS-0.03, and NFS/rGO-SDS-0.06

| Sample           | $R_{st}$ ( $\Omega$ ) | $R_{ct}$ ( $\Omega$ ) |
|------------------|-----------------------|-----------------------|
| NFS/rGO          | 5.513                 | 661.3                 |
| NFS/rGO-SDS-0.03 | 4.750                 | 348.1                 |
| NFS/rGO-SDS-0.06 | 4.685                 | 517.4                 |

**Table S11.** Calculated contribution ratios of capacitive and diffusion-controlled behaviors for NFS/rGO at different scan rates

| Scan rate (mV s <sup>-1</sup> ) | Diffusion | Capacitive |
|---------------------------------|-----------|------------|
| 0.2                             | 0.0743    | 0.9257     |
| 0.4                             | 0.0554    | 0.9446     |
| 0.6                             | 0.0455    | 0.9555     |
| 0.8                             | 0.0419    | 0.9581     |
| 1.0                             | 0.0319    | 0.9681     |

**Table S12.** Calculated contribution ratios of capacitive and diffusion-controlled behaviors for NFS/rGO-SDS-0.03 at different scan rates

| Scan rate (mV s <sup>-1</sup> ) | Diffusion | Capacitive |
|---------------------------------|-----------|------------|
| 0.2                             | 0.093     | 0.9063     |
| 0.4                             | 0.0737    | 0.9263     |
| 0.6                             | 0.0605    | 0.9395     |
| 0.8                             | 0.0515    | 0.9485     |
| 1.0                             | 0.0420    | 0.9580     |

**Table S13.** Calculated contribution ratios of capacitive and diffusion-controlled behaviors for NFS/rGO-SDS-0.06 at different scan rates

| Scan rate (mV s <sup>-1</sup> ) | Diffusion | Capacitive |
|---------------------------------|-----------|------------|
| 0.2                             | 0.1101    | 0.8899     |
| 0.4                             | 0.0890    | 0.9110     |
| 0.6                             | 0.0719    | 0.9281     |
| 0.8                             | 0.0619    | 0.9381     |
| 1.0                             | 0.0522    | 0.9478     |

**Table S14.** Comparison of representative sodium iron sulfate cathodes

| Cathode                                                                                                                    | Voltage (V) | Capacity (mAh g <sup>-1</sup> )                                    | Cycling stability                                 | Environmental stability                                                                        |
|----------------------------------------------------------------------------------------------------------------------------|-------------|--------------------------------------------------------------------|---------------------------------------------------|------------------------------------------------------------------------------------------------|
| Na <sub>2</sub> Fe <sub>2</sub> (SO <sub>4</sub> ) <sub>3</sub> <sup>S1</sup>                                              | ~3.8        | 101 (0.05C); 54 (20C)                                              | Not reported                                      | Not reported                                                                                   |
| NFS@C@2%CNTs <sup>S2</sup>                                                                                                 | ~3.5        | 95.9 (0.05C); 60 (10C)                                             | 94.7% after 250 cycles at 2 C                     | Not reported                                                                                   |
| Na <sub>2.5</sub> Fe <sub>1.75</sub> (SO <sub>4</sub> ) <sub>3</sub> /C <sup>S3</sup>                                      | ~3.8        | 107.6 (0.1C); 65.3 (10C)                                           | 65.9% after 200 cycles at 1 C                     | Not reported                                                                                   |
| Na <sub>2+2δ</sub> Fe <sub>2-δ</sub> (SO <sub>4</sub> ) <sub>3</sub> /C <sup>S4</sup>                                      | 3.75        | 82.0 (0.05C); 54 (10C)                                             | 92.2% after 1000 cycles at 10 C                   | Not reported                                                                                   |
| Na <sub>2.26</sub> Fe <sub>1.87</sub> (SO <sub>4</sub> ) <sub>3</sub> /rGO <sup>S5</sup>                                   | ~3.7        | 96 (0.05C); 80 (10C)                                               | 65.32% after ~5600 cycles at 5 C                  | Not reported                                                                                   |
| Na <sub>2.72</sub> Fe <sub>1.64</sub> (SO <sub>4</sub> ) <sub>3</sub> /FG <sup>S6</sup>                                    | ~3.8        | 110 (0.1C); 79 (15C)                                               | 80.7% after 15000 cycles at 15 C                  | Not reported                                                                                   |
| Na <sub>2.4</sub> Fe <sub>1.8</sub> (SO <sub>4</sub> ) <sub>3</sub> /rGO <sup>S7</sup>                                     | 3.75        | 100 (0.05C); 54 (30C)                                              | 58% after 10000 cycles at 10 C                    | Not reported                                                                                   |
| Na <sub>2.60</sub> Fe <sub>1.70</sub> (SO <sub>4</sub> ) <sub>3</sub> /rGO <sup>S8</sup>                                   | 3.74        | 80 (0.1C); 45 (10C)                                                | 73% after 500 cycles at 8 C                       | Not reported                                                                                   |
| Na <sub>2</sub> Fe <sub>2</sub> (SO <sub>4</sub> ) <sub>3</sub> /C/rGO <sup>S9</sup>                                       | 3.75        | 107.9 (0.1C); 75.1 (10C)                                           | 80.1% after 800 cycles at 5 C                     | Not reported                                                                                   |
| Na <sub>8</sub> Fe <sub>5</sub> (SO <sub>4</sub> ) <sub>9</sub> /rGO <sup>S10</sup>                                        | 3.8         | 102.2 (0.2C); 63 (50C)                                             | 91.9% after 1000 cycles at 10 C                   | Not reported                                                                                   |
| Na <sub>6</sub> Fe <sub>5</sub> (SO <sub>4</sub> ) <sub>8</sub> /CNTs <sup>S11</sup>                                       | 3.74        | 110.2 (0.1C); 86.4 (2C)                                            | >100% after 1000 cycles at 2 C                    | Not reported                                                                                   |
| Na <sub>2.5</sub> Fe <sub>2</sub> (SO <sub>4</sub> ) <sub>2.5</sub> (PO <sub>4</sub> ) <sub>0.5</sub> /KB <sup>S12</sup>   | 3.6         | 112 (0.2C); 79.5 (20C)                                             | 88.8% after 10,000 cycles at 10 C                 | 1 week in air, ~60% RH; stable                                                                 |
| Na <sub>2.9</sub> Fe <sub>1.7</sub> (SO <sub>4</sub> ) <sub>2.7</sub> (PO <sub>4</sub> ) <sub>0.3</sub> /AB <sup>S13</sup> | 3.57        | 100.4 (0.1C); 86.7 (30C)                                           | 85.5% after 6000 cycles at 30 C                   | 1 week in air, ~50% RH; stable                                                                 |
| Na <sub>2.466</sub> Fe <sub>1.724</sub> Mg <sub>0.043</sub> (SO <sub>4</sub> ) <sub>3</sub> /rGO <sup>S14</sup>            | 3.74        | 102.2 (10 mA g <sup>-1</sup> );<br>79.4 (2000 mA g <sup>-1</sup> ) | 70.8% after 5000 cycles at 500 mA g <sup>-1</sup> | 24 h at 45% RH;<br>11.2 mAh g <sup>-1</sup> capacity drop<br>1 week in air, ~50% RH;<br>stable |
| <b>This work</b>                                                                                                           | <b>~3.8</b> | <b>102.3 (0.1C); 81.5 (30C)</b>                                    | <b>80.0% after 5000 cycles at 30 C</b>            |                                                                                                |

## Reference

- [S1] P. Barpanda, G. Oyama, S.-i. Nishimura, S.-C. Chung and A. Yamada, *Nat. Commun.*, 2014, 5, 4358.
- [S2] W. Yang, Q. Liu, L. Hou, Q. Yang, D. Mu, G. Tan, L. Li, R. Chen and F. Wu, *Small*, 2023, 20, 2306595.
- [S3] Y. Liu, Y. Han, Z. Song, W. Song, Z. Miao, Y. Chen, J. Ding and W. Hu, *ACS Appl. Mater. Interfaces*, 2024, 16, 13828-13838.
- [S4] W. Yang, Q. Liu, Q. Yang, S. Lu, W. He, L. Li, R. Chen and F. Wu, *Energy Storage Mater.*, 2025, 74, 103925.
- [S5] J. Zhang, Y. Yan, X. Wang, Y. Cui, Z. Zhang, S. Wang, Z. Xie, P. Yan and W. Chen, *Nat. Commun.*, 2023, 14, 3701.
- [S6] Q. Xiao, Y. Li, K. Wang, C. Ma, B. Liu and Y. Zhao, *J. Mater. Chem. A*, 2025, 13, 3727-3734.
- [S7] Y. Fang, Q. Liu, X. Feng, W. Chen, X. Ai, L. Wang, L. Wang, Z. Ma, Y. Ren, H. Yang and Y. Cao, *J. Energy Chem.*, 2021, 54, 564-570.
- [S8] Y. Li, Y. Zhang, Y. Tang, J. Xie, W. Ma, L. Deng and L. Liu, *Appl. Mater. Today*, 2023, 35, 101966.
- [S9] M. Chen, D. Cortie, Z. Hu, H. Jin, S. Wang, Q. Gu, W. Hua, E. Wang, W. Lai, L. Chen, S. L. Chou, X. L. Wang and S. X. Dou, *Adv. Energy Mater.*, 2018, 8, 1800944.
- [S10] C. Liu, K. Chen, H. Xiong, A. Zhao, H. Zhang, Q. Li, X. Ai, H. Yang, Y. Fang and Y. Cao, *eScience*, 2024, 4, 100186.
- [S11] S. Li, X. Song, X. Kuai, W. Zhu, K. Tian, X. Li, M. Chen, S. Chou, J. Zhao and L. Gao, *J. Mater. Chem. A*, 2019, 7, 14656-14669.
- [S12] C. Liu, K. Chen, F. Li, A. Zhao, P. Liu, Z. Chen, Y. Fang and Y. Cao, *J. Am. Chem. Soc.*, 2025, 147, 14635-14646.
- [S13] C. Liu, K. Chen, F. Li, A. Zhao, Z. Chen, Y. Fang and Y. Cao, *Nano Energy*, 2024, 125, 109557.
- [S14] L. Wen, J. Zhang, J. Zhang, L. Zhao, X. Wang, S. Wang, S. Ma, W. Li, J. Luo, J. Ge and W. Chen, *eScience*, 2025, 5, 100313.
